# Supplementary material
Source: MDPI journal article supplement (https://www.mdpi.com/2673-4168/1/2/7)
Supplement: s1 [file s1 › obesities-1250241-supplementary.pdf]

# Supplementary Materials: Acute and Chronic Effects of Low-Volume High-Intensity Interval Training Compared to Moderate-Intensity Continuous Training on Glycemic Control and Body Composition in Older Women with Type 2 Diabetes

Table S1. HIIT progression protocol from week 1 to 4.

| Monday    | Bloc                                | Week 1    | Week 2    | Week 3    | Week 4    | Week 5    |
|-----------|-------------------------------------|-----------|-----------|-----------|-----------|-----------|
|           | Warm up                             | 40%       | 55%       | 55%       | 55% / 75% | 55% / 75% |
|           | Int 1                               | 60% / 40% | 60% / 40% | 60% / 45% | 75% / 45% | 90% / 45% |
|           | Int 2                               | 60% / 40% | 75% / 40% | 75% / 45% | 90% / 45% | 90% / 45% |
|           | Int 3                               | 60% / 40% | 60% / 40% | 60% / 45% | 75% / 45% | 90% / 45% |
|           | ACTIVE RECOVERY 2 MINUTES @ 45% HRR |           |           |           |           |           |
|           | Int 4                               | 60% / 40% | 60% / 40% | 60% / 40% | 75% / 45% | 90% / 45% |
|           | Int 5                               | 60% / 40% | 75% / 40% | 75% / 40% | 90% / 45% | 90% / 45% |
|           | Int 6                               | 60% / 40% | 60% / 40% | 60% / 40% | 75% / 45% | 90% / 45% |
|           | Cool down                           | 40%       | 40%       | 40%       | 40%       | 40%       |
| Wednesday | Bloc                                | Week 1    | Week 2    | Week 3    | Week 4    | Week 5    |
|           | Warm up                             | 40%       | 55%       | 55%       | 55% / 75% | 55% / 75% |
|           | Int 1                               | 60% / 40% | 60% / 40% | 60% / 45% | 75% / 45% | 90% / 45% |
|           | Int 2                               | 60% / 40% | 75% / 40% | 75% / 45% | 90% / 45% | 90% / 45% |
|           | Int 3                               | 60% / 40% | 60% / 40% | 60% / 45% | 75% / 45% | 90% / 45% |
|           | ACTIVE RECOVERY 2 MINUTES @ 45% HRR |           |           |           |           |           |
|           | Int 4                               | 60% / 40% | 60% / 40% | 60% / 45% | 75% / 45% | 90% / 45% |
|           | Int 5                               | 60% / 40% | 75% / 40% | 75% / 45% | 90% / 45% | 90% / 45% |
|           | Int 6                               | 60% / 40% | 60% / 40% | 60% / 45% | 75% / 45% | 90% / 45% |
|           | Cool down                           | 40%       | 40%       | 40%       | 40%       | 40%       |
| Friday    | Bloc                                | Week 1    | Week 2    | Week 3    | Week 4    | Week 5    |
|           | Warm up                             | 40%       | 55%       | 55%       | 55% / 75% | 55% / 75% |
|           | Int 1                               | 60% / 40% | 60% / 45% | 75% / 45% | 75% / 45% | 90% / 45% |
|           | Int 2                               | 60% / 40% | 75% / 45% | 75% / 45% | 90% / 45% | 90% / 45% |
|           | Int 3                               | 60% / 40% | 60% / 45% | 75% / 45% | 75% / 45% | 90% / 45% |
|           | ACTIVE RECOVERY 2 MINUTES @ 45% HRR |           |           |           |           |           |
|           | Int 4                               | 60% / 40% | 60% / 45% | 60% / 45% | 75% / 45% | 90% / 45% |
|           | Int 5                               | 60% / 40% | 75% / 45% | 75% / 45% | 90% / 45% | 90% / 45% |
|           | Int 6                               | 60% / 40% | 60% / 45% | 60% / 45% | 75% / 45% | 90% / 45% |
|           | Cool down                           | 40%       | 40%       | 40%       | 40%       | 40%       |

Data are presented in % of Heart Rate Reserve (HRR); Int = interval; Week 4 the warmup is split in 2 distinct phase: 2 minutes at 55% HRR and 1 minute at 75% HRR. The intensity of exercise at week 5 is the same until week 12.
